# Supplementary material for: Effects of Sex and Breeding Status on Skull Morphology in Cooperatively Breeding Ansell’s Mole-Rats and an Appraisal of Sexual Dimorphism in the Bathyergidae
Source: Frontiers journal article supplement (doi:10.3389/fevo.2021.638754), 2021-06-24
Supplement: Data_Sheet_1.XLSX [file Data_Sheet_1.XLSX]

## Sheet: Linear cranial measurements
Specimen number	Sex	Breeding status	Age (years)	DIAS	PALA	UPAL	PREW	BULL	BULW	BASI	SKUL	IORW	ZYPW	ZYAW	BASW	PAPW	FIOL	PZMW	INCW	ROSL	SKUH	CONW	SOCC	MANL	MANH	CONH	ANGL	Hindfoot length
9	f	repro	10	10.6	19.23	6.15	2.12	8.26	6.31	27.34	30.96	10.42	4	22.57	6.82	13.45	1.54	1.27	5.22	15.54	10.62	7.25	5.34	21.8	10.03	8.38	15.05	18.85
12	f	repro	4	12.18	21.71	6.07	2.15	8.55	6.23	29.8	34.51	10.11	4.41	23.83	10.1	14.52	1.53	1.37	5.7	16.31	11.4	7.83	5.86	24.13	11.77	9.03	16.31	22.3
18	f	repro	12	11.47	21.29	6.84	2.4	8.35	6.49	29.69	35.32	10.65	3.56	23.9	9.41	14.32	1.49	1.24	6.52	15.58	12.06	7.78	6	23.32	11.86	8.77	15.15	21.4
22	f	repro	10.5	13.23	21.49	5.26	1.75	8.69	6.71	30.3	34.35	10.46	3.9	23.92	7.27	13.41	1.43	1.4	5.79	16.8	11.78	7.45	5.17	23.95	10.94	8.56	16.44	21
24	f	repro	5	13.21	22.23	6.17	2.02	9.22	6.97	31.32	36.15	10.65	4.01	25.57	7.7	14.85	1.2	1.41	6.42	17.4	11.96	8.05	6.18	24.72	10.71	9.25	17.44	23.15
27	f	repro	10	12.23	20.87	5.61	1.92	8.59	6.6	29.07	33.58	9.83	3.7	22.89	6.65	13.44	1.16	0.96	5.25	16.78	11.01	7.35	5.47	23.01	10.23	8	14.01	21.6
32	f	repro	9	12.13	19.78	4.17	1.88	8.2	5.98	28.47	32.25	9.04	3.36	22.72	7.78	12.51	1.28	1.13	5.56	14.01	10.32	7.36	5.68	21.88	10.05	7.8	14.11	21.1
36	f	repro	5	11.24	19.55	5.87	2	8.41	5.96	27.39	31.37	9.97	3.89	22.94	7.2	13.88	1.28	1.18	5.64	15.34	10.52	7.39	5.49	22.31	9.81	7.64	14.91	19.7
41	f	repro	14	12.15	21.58	5.79	2.42	9.76	6.5	29.68	34.75	10.89	4.47	25.22	7.06	14.36	1.49	1.42	6.02	17.64	11.84	8.08	6.2	25.26	11.31	9.76	16.77	22.3
42	f	repro	10.75	13.34	22.03	5.55	1.94	9.47	7.3	30.89	35.6	10.31	4.01	24.88	8.15	14.62	1.25	1.11	6.23	17.12	11.68	8.1	5.83	25.06	10.49	8.22	15.83	22.42
3	m	repro	11	14.38	24.36	5.92	2.51	10.24	7.32	33.3	37.14	11.93	4.85	27.81	8.04	15.14	3.42	1.5	6.33	18.44	12.27	8.47	7.1	26.64	12.88	9.55	17.31	22.65
5	m	repro	9	13.72	23.51	5.81	2.22	9.28	6.93	32.17	35.21	11.3	4.72	25.32	7.82	14.82	1.94	1.42	6.4	17.48	12.65	7.36	6.32	25.8	11.53	9.9	16.68	21.85
10	m	repro	10	14.25	22.95	5.7	1.98	8.96	6.78	31.78	36.29	11.6	3.87	26.22	8.16	14.52	1.91	1.79	6.42	17.32	12.27	7.92	6.06	25.14	13.5	10.43	17.08	24.26
14	m	repro	4	11.69	21.54	6.6	2.12	8.93	6.7	29.98	34.12	10.92	4.23	26.35	9.36	14.74	1.82	1.68	6.4	15.49	11.8	7.48	6.72	23.59	12.03	9.81	17.3	23.35
21	m	repro	13	13.68	23.86	7.49	2.24	9.52	6.68	33.32	37.82	11.05	4.23	27.26	7.99	14.51	1.48	1.83	7.09	18.55	12.66	8.22	6.21	26.51	11.97	10.23	17.55	23.07
23	m	repro	11	12.85	22.91	5.8	2	9.07	6.93	31.06	34.9	11.18	4.11	26.28	7.84	14.27	1.18	1.39	6.89	16.92	12.44	7.5	6.75	25.16	11.92	10.14	17.18	21.8
26	m	repro	7	13.94	23.25	6.08	2.04	9.55	7.1	32.02	35.63	11.95	4.47	27.4	7.55	14.79	2.07	1.67	6.8	17.14	12.66	8.04	6.25	25.59	12.78	10.93	17.39	23.37
29	m	repro	16	15.96	25.72	5.67	2.14	10.51	7.5	34.82	38.39	12.89	5.27	29.21	7.71	16.44	1.89	1.81	7.68	19.21	13.61	7.83	5.81	28.82	15.8	10.43	19.37	22.5
34	m	repro	4	13.54	22.11	5.4	1.96	8.86	6.07	31.02	35.17	10.91	4.43	26.07	8.08	14.45	0.98	1.44	6.45	16.31	11.62	7.24	7.27	24.77	11.92	9.96	17.24	21.5
43	m	repro	10	15.83	25.31	6.33	2.06	9.45	7.02	34.93	39.05	13.23	4.1	28.14	8.02	15.68	1.06	2.29	7.93	18.59	14.3	8.06	7.35	27.55	13.34	10.43	19.04	24.7
6	f	non-repro	2.5	11.2	19.6	5.9	2.5	8.17	5.8	27.53	31.7	9.33	3.85	21.19	7.76	14.97	1.45	1.31	4.73	14.75	9.93	7.82	5.35	21.93	10.01	8.87	14.4	20.14
7	f	non-repro	2.5	11.1	19.93	5.95	2.25	7.49	5.71	27.24	31.94	10.23	3.6	21.32	7.4	13	1.86	1.49	5.31	15.78	10.64	7.36	5.75	21.44	10.3	8.39	13.46	19.05
8	f	non-repro	3	12.43	21.18	5.94	2.17	8.46	5.99	28.83	33.29	9.43	3.5	22.9	7.52	14.81	1.25	1.48	5.34	15.69	10.77	7.62	5.58	22.6	11.46	8.75	16.27	22.4
13	f	non-repro	3.5	13.05	21.77	6.18	2.06	9.13	7.02	29.75	33.91	10.41	4.26	23.67	8.93	15.23	2.18	1.1	5.73	15.12	11.65	8.02	5.31	23.9	11.86	9.4	16.71	21.21
16	f	non-repro	2.5	11.92	21.13	5.95	1.93	8.71	6.26	29.12	33.73	10.02	4.06	23.85	10.7	15.84	1.56	1.28	5.8	15.85	10.81	7.78	5.01	24.21	10.78	9.38	16.79	21.13
25	f	non-repro	4.5	12.48	21.99	6	1.85	8.83	6.61	30.36	34.94	10.42	4.53	24.19	7.66	12.96	1.7	1.2	6.05	16.23	11.86	7.94	4.94	24.54	10.67	9.03	15.3	20.3
31	f	non-repro	5	11.75	19.79	6.05	1.83	8.59	6.58	28.08	31.94	9.91	3.53	22.81	6.9	13.71	1.19	1.21	5.32	14.48	10.12	7.27	5.68	22.58	10.47	8.43	14.66	20
33	f	non-repro	5	12.64	21.99	6.31	1.81	9.38	7.3	30.64	35.32	12.09	4.02	26.65	7.88	14.33	1.61	1.7	5.99	16.07	11.41	8.28	6.29	25.36	12.48	9.62	18.4	21.6
40	f	non-repro	3	13.82	23.13	6.51	2.06	9.4	7.6	31.36	36.53	11.14	3.94	25.35	7.84	14.48	1.57	1.41	6.2	16.11	11.35	8.13	6.64	24.48	11.21	8.88	16.42	23.78
45	f	non-repro	4.5	12.61	21.63	6.52	1.92	8.56	6.51	30.04	34.72	10.83	3.93	23.97	7.94	14.22	1.53	1.34	5.89	16.05	11.15	7.63	6.14	23.16	11.08	8.84	15.53	22.6
11	m	non-repro	4	13.36	23.37	6.32	2.13	8.89	6.57	32.61	36	12.15	4.09	25.88	7.11	14.35	1.49	1.76	6.43	18.22	12.32	7.04	6.62	25.39	11.6	9.36	18	22.03
15	m	non-repro	3	13.45	23.03	6.41	2.32	8.83	6.61	31.83	35.92	10.91	4.21	26.64	10.04	13.99	1.41	1.64	6.77	16.62	11.46	7.41	6.37	25.29	12.63	10.67	17.16	20.94
17	m	non-repro	4	13.94	23.44	5.93	2.09	9.14	6.61	32.76	37.16	11.65	4.58	27.35	9.13	15.24	2.15	1.97	6.46	18.65	12.98	8.43	6.13	26.55	13.28	11.1	19.43	23.04
20	m	non-repro	3	13.87	24.21	6.43	2.38	8.47	6.27	32.49	36.89	11.4	4.32	26.5	7.54	14.78	1.24	1.67	6.62	18.05	11.34	7.91	7.34	25.57	11.78	9.64	17.86	23.47
28	m	non-repro	13	15.85	25.49	6.05	2.03	9.76	7.44	34.83	39.05	13.43	4.68	28.35	7.29	15.41	2.12	1.72	7.5	19.17	13.65	8.08	6.98	27.54	13.65	10.38	19.96	24.6
35	m	non-repro	5.5	13.94	23.14	5.19	2.19	9.6	6.93	31.03	35.45	11.35	4.18	25.96	7.08	13.96	1.46	1.31	6.45	17.91	12.05	7.62	6.51	25.61	12.15	9.76	17.55	20
37	m	non-repro	2.75	14.32	24.52	6.67	2.07	9.32	7.12	33.76	37.22	13.35	4.49	27.09	7.6	15.08	1.67	1.81	6.79	18.52	12.54	7.98	7.78	26.14	13.25	9.88	17.22	23
38	m	non-repro	9	13.36	21.94	6.23	2.11	8.95	6.38	31.68	35.69	10.96	4.25	25.48	8.46	14.93	1.68	1.7	6.39	16.81	12.14	7.57	5.58	25.11	12.79	9.12	17.62	22.6
39	m	non-repro	4.25	14.57	23.84	5.72	1.87	9.39	6.66	32.82	36.82	11.75	4.17	26.85	8.09	15.75	1.77	1.84	6.74	18.05	12.52	8.45	7.25	25.24	13.37	9.57	17.71	23.45
44	m	non-repro	12	12.82	22.61	5.81	1.9	9.56	7.11	31.44	36.38	12.24	4.29	27	7.41	15.04	1.4	1.37	6.92	17.4	13.84	7.33	6.6	25.56	12.87	9.42	16.4	21.4
