# Supplementary material for: Effects of Sex and Breeding Status on Skull Morphology in Cooperatively Breeding Ansell’s Mole-Rats and an Appraisal of Sexual Dimorphism in the Bathyergidae
Source: Frontiers journal article supplement (doi:10.3389/fevo.2021.638754), 2021-06-24
Supplement: Data_Sheet_2.DOCX [file Data_Sheet_2.DOCX]

Supplementary Table 2: Overview and definitions of point landmarks used to characterize skull traits in *Fukomys anselli*.

| **Dorsal cranial landmark** | **Description** |
| --- | --- |
| 1 | Posteriormost median point of skull |
| 2 | Point of fusion between sagittal crest and nuchal crest |
| 3 | Median point of suture between frontals and parietals |
| 4 | Median point of suture between frontals and nasals |
| 5 | Anteriormost point of intranasal suture |
| 6 | Anteriormost visible median point of premaxillary |
| 7 | Lateral point of incisor erupting from the premaxillary |
| 8 | Anterior rim of infraorbital foramen |
| 9 | Deepest indentation of bony orbit |
| 10 | Most anterolateral point of nuchal crest |
| 11 | Posteriormost point of paroccipital process |
| 12 | Foramen for ramus temporalis of the facial cranial nerve |
| 13 | Deepest visible indentation of frontals |
| **Ventral cranial landmark** | **Description** |
| 1 | Posteriormost median point of skull |
| 2 | Anteriormost point of foramen magnum |
| 3 | Median point of suture between basioccipital and sphenoid |
| 4 | Staphylion |
| 5 | Posteriormost point of foramen incisivum |
| 6 | Anteriormost visible median point of premaxillary |
| 7 | Lateral point of incisor erupting from the premaxillary |
| 8 | Anteriormost point of dental row |
| 9 | Posteriormost point of dental row |
| 10 | Lateral most point of bony protrusion at orbit |
| 11 | Most lateral point of auditory meatus |
| 12 | Posteriormost point of paroccipital process |
| 13 | Tip of styliform process of the tympanic bulla |
| **Mandibular landmark** | **Description** |
| 1 | Apical tip of coronoid process |
| 2 | Ventralmost point of arch connecting the coronoid apex and the glenoid. |
| 3 | Anteriormost point of the condyle |
| 4 | Highest (dorsal) point of the condyle |
| 5 | Point marking the fusion of the corpus mandibulae and the angular process posteriorly. |
| 6 | Posterior tip of the angular process |
| 7 | Ventral margin of the angular process at the level of the highest point of the condyle |
| 8 | Point demarcating the anterior intersection of the angular process and the corpus mandibulae from a lateral view. |
| 9 | Ventral anterior point of incisor erupting from the mandible |
| 10 | Dorsal anterior point of incisor erupting from the mandible |
| 11 | Anteriormost point of bony alveolar margin of the premolar |
| 12 | Point demarcating the anterior intersection of the coronoid process and the corpus mandibulae from a lateral view |
